# Supplementary material
Source: PubMed Central journal article supplement (PMC3545470)
Supplement: NIHMS422427-supplement-03.pdf [file NIHMS422427-supplement-03.pdf]

Supplemental Appendix 3. New Scoring Algorithm. The raw domain scores are derived by adding the points for the questions comprising each domain. Where an answer to a question is not assigned a point, the score for that answer is zero. The final domain scores are generated by multiplying the raw score with a weight index (see Table 3). The total score is the sum of all domain scores.

| Domain                  | Item             | Answer | Points |   |
|-------------------------|------------------|--------|--------|---|
| Orthostatic Intolerance | 1                | 1      | 1      |   |
|                         |                  | 2      | 1      |   |
|                         |                  | 3      | 2      |   |
|                         |                  | 4      | 3      |   |
|                         | 3                | 1      | 1      |   |
|                         |                  | 2      | 2      |   |
|                         |                  | 3      | 3      |   |
|                         | 4                | 1      | 3      |   |
|                         |                  | 2      | 2      |   |
|                         |                  | 3      | 1      |   |
|                         | Vasomotor        | 5      | 1      | 1 |
|                         |                  |        | 1      | 1 |
| 6                       |                  | 2      | 1      |   |
|                         |                  | 1      | 3      |   |
| 7                       |                  | 2      | 2      |   |
|                         |                  | 3      | 1      |   |
| Secretomotor            | 8                | 1      | 1      |   |
|                         |                  | 4      | 1      |   |
|                         |                  | 5      | 2      |   |
|                         | 9                | 1      | 1      |   |
|                         |                  | 1      | 1      |   |
|                         | 10               | 1      | 1      |   |
|                         |                  | 2      | 3      |   |
|                         | 11               | 3      | 2      |   |
|                         |                  | 4      | 1      |   |
|                         | Gastrointestinal | 12     | 1      | 2 |
|                         |                  |        | 2      | 1 |
| 13                      |                  | 2      | 1      |   |
|                         |                  | 3      | 2      |   |
| 14                      |                  | 2      | 1      |   |
|                         |                  | 3      | 2      |   |
| 15                      |                  | 2      | 1      |   |
|                         |                  | 3      | 2      |   |
| 16                      |                  | 1      | 1      |   |
|                         |                  | 2      | 1      |   |
| 17                      |                  | 3      | 2      |   |
|                         |                  | 4      | 3      |   |
|                         |                  | 1      | 1      |   |
| 18                      |                  | 2      | 2      |   |
|                         |                  | 3      | 3      |   |

|              |    |   |   |
|--------------|----|---|---|
|              | 19 | 1 | 3 |
|              |    | 2 | 2 |
|              |    | 3 | 1 |
|              | 20 | 1 | 1 |
|              | 21 | 2 | 1 |
|              |    | 3 | 2 |
|              |    | 4 | 3 |
|              | 22 | 1 | 1 |
|              |    | 2 | 2 |
|              |    | 3 | 3 |
|              | 23 | 1 | 3 |
|              |    | 2 | 2 |
|              |    | 3 | 1 |
| Bladder      |    |   |   |
|              | 24 | 2 | 1 |
|              |    | 3 | 2 |
|              |    | 4 | 3 |
|              | 25 | 2 | 1 |
|              |    | 3 | 2 |
|              |    | 4 | 3 |
|              | 26 | 2 | 1 |
|              |    | 3 | 2 |
|              |    | 4 | 3 |
| Pupillomotor |    |   |   |
|              | 27 | 2 | 1 |
|              |    | 3 | 2 |
|              |    | 4 | 3 |
|              | 28 | 1 | 1 |
|              |    | 2 | 2 |
|              |    | 3 | 3 |
|              | 29 | 2 | 1 |
|              |    | 3 | 2 |
|              |    | 4 | 3 |
|              | 30 | 1 | 1 |
|              |    | 2 | 2 |
|              |    | 3 | 3 |
|              | 31 | 2 | 3 |
|              |    | 3 | 2 |
|              |    | 4 | 1 |
